# Supplementary material for: Dysregulated Handling of Dietary Protein and Muscle Protein Synthesis After Mixed-Meal Ingestion in Maintenance Hemodialysis Patients
Source: PubMed Central journal article supplement — Kidney Int Rep. 2018 Aug 17;3(6):1403–15. doi: 10.1016/j.ekir.2018.08.001 (PMC6224635; doi:10.1016/j.ekir.2018.08.001), 2018-08-17
Supplement: mmc1.pdf [file mmc1.pdf]

### Supplemental Figure S1

| Group    | MHD                                                                               |                                                                                   | CTR                                                                               |                                                                                   |
|----------|-----------------------------------------------------------------------------------|-----------------------------------------------------------------------------------|-----------------------------------------------------------------------------------|-----------------------------------------------------------------------------------|
| Time     | Basal                                                                             | Fed                                                                               | Basal                                                                             | Fed                                                                               |
| LAT1     |  |  |  |  |
| p-mTORC1 |  |  |  |  |
| t-mTORC1 |  |  |  |  |

Representative blots of total protein content of large neutral amino acid transporter 1 (LAT1), phosphorylation and total protein content of mammalian target of rapamycin complex 1 (mTORC1) at Ser2448 before and after mixed meal ingestion in MHD patients (n=8) and controls (n=8).
