# Supplementary material for: Dysregulated Handling of Dietary Protein and Muscle Protein Synthesis After Mixed-Meal Ingestion in Maintenance Hemodialysis Patients
Source: PubMed Central journal article supplement — Kidney Int Rep. 2018 Aug 17;3(6):1403–15. doi: 10.1016/j.ekir.2018.08.001 (PMC6224635; doi:10.1016/j.ekir.2018.08.001), 2018-08-17
Supplement: mmc2.pdf [file mmc2.pdf]

## Supplemental Figure S2

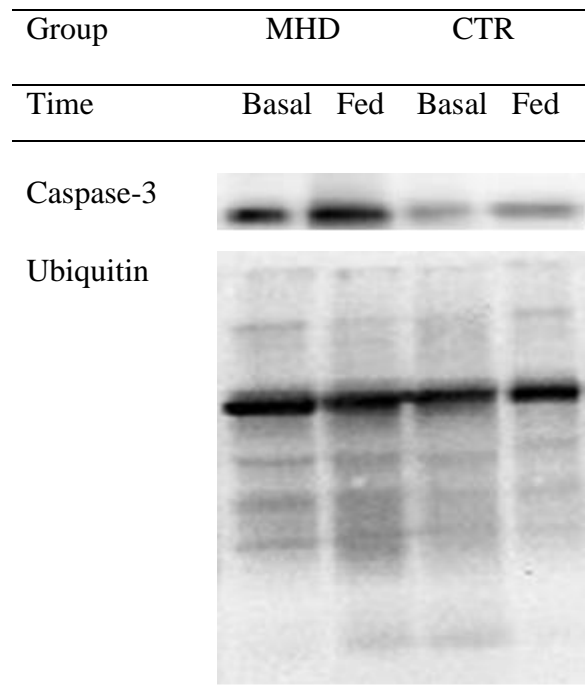

Representative blots of total protein content of caspase-3 and ubiquitin before and after mixed meal ingestion in MHD patients (n=8) and controls (n=8).
