# Supplementary material for: Dysregulated Handling of Dietary Protein and Muscle Protein Synthesis After Mixed-Meal Ingestion in Maintenance Hemodialysis Patients
Source: PubMed Central journal article supplement — Kidney Int Rep. 2018 Aug 17;3(6):1403–15. doi: 10.1016/j.ekir.2018.08.001 (PMC6224635; doi:10.1016/j.ekir.2018.08.001), 2018-08-17
Supplement: mmc3.pdf [file mmc3.pdf]

**Supplemental Table 1.** Self-reported dietary intake during 2d prior to infusion trial.

|                                                                  | MHD<br>( <i>n</i> =8) | Controls<br>( <i>n</i> =8) | P-value |
|------------------------------------------------------------------|-----------------------|----------------------------|---------|
| Energy (kcal/d <sup>-1</sup> )                                   | 1742 ± 236            | 1929 ± 167                 | 0.17    |
| Protein (g/kg <sup>-1</sup> body weight · d <sup>-1</sup> )      | 0.9 ± 0.1             | 1.1 ± 0.1                  | 0.07    |
| Carbohydrate (g/kg <sup>-1</sup> body weight · d <sup>-1</sup> ) | 2.4 ± 0.3             | 2.8 ± 0.3                  | 0.17    |
| Fat (g/kg <sup>-1</sup> body weight · d <sup>-1</sup> )          | 1.0 ± 0.2             | 1.1 ± 0.1                  | 0.47    |
